# Supplementary material for: Distinct and Overlapping Functions of ptpn11 Genes in Zebrafish Development
Source: PubMed Central journal article supplement (PMC3988099; doi:10.1371/journal.pone.0094884), 2014-04-15
Supplement: pone.0094884.s001.pdf [file pone.0094884.s001.pdf]

hShp2.pro MT SRRWFHPNI TGVEAENLLLRGVDSGLARPSKSNPQDFTLSVRRNGAVTHI KI QNTGDYDLYGGEKFATLAELVQYMEHHGQLKEKNGDVI ELKY 100  
zshp2a.pro MT SRRWFHPNI TGVEAENLLLRGVDSGLARPSKSNPQDFTLSVRRNGAVTHI KI QNTGDYDLYGGEKFATLAELVQYMEHHGQLKEKNGDVI ELKY 100  
zshp2b.pro MT SRRWFHPNI TGEAEHLLLRGVDSGLARPSKSNPQDFTLSVRRNDEVTHI KI QNSGDYDLYGGEKFATLAELVQYTECHDLRERNGDVI ELKY 100

hShp2.pro PLNCADPTSERWFHGLSGKEAEKLLTEKKGHSFLVRESQSHPGDFVLSVRTGDDKESNDGSKVTHVM RCQELKYDVGGERFDSLTLDLVEHYKK 199  
zshp2a.pro PLNCADPTSERWFHGLSGREAEKLLTEKKGHSFLVRESQSHPGDFVLSVRTGDDKTDTSQKPKVTHVM RCQHDLYDVGGERFDSLTLDLVEHYKK 200  
zshp2b.pro PLNCKDPTSERWFHGLSGRDAEKLLTEKKGHSFLVRESQSHPGDFVLSVRTNEEKHENVDRKTKVTHVM RYCQDKYDVGGERFDTLADLVEHYKK 199

hShp2.pro NPMVETLGTVLQLKQPLNTRINAEEESRVRELSKLAETTDKVKOGFWEEFELQQECKLLYSRKEGORQENKNKNRYKNI L PFDHTRVVLHDGDPNE 299  
zshp2a.pro NPMVETLGTVLQLKQPLNTRINAEEESRVRELSKLAETTDKVKOGFWEEFELQQECKLLYSRKEGORPENKNKNRYKNI L PFDHTRVVLHDGDPNE 300  
zshp2b.pro NPMVEKSGVWHLKQPLNTRINAENRVLHELKXVADNSEKPKGGFWEEFELQQECKLLYRKEGORPENKNKNRYKNI L PFDHTRVVLHDGDPNE 299

hShp2.pro PMSDYI NANIMPEEETKCNNSKPKYSYI ATQGCLQNTVNDFRMVFQENSRI VMTTKEVERGSKOVKYMPDEYALKEYGMRVNRNPKESAHDYTLR 389  
zshp2a.pro QGSDYI NANLIMPDNEAKSNNSKPKYSYI ATQGCLQNTSDFWRMVFQENSRI VMTTKEVERGSKOVKYMPDYSALKEYGMRVNRNPKETMAHDYILR 400  
zshp2b.pro PGSDYI NANYRSVINEEGRHMDEGKVFATQGCLQNTVDFWVMYQENTHVI VMTTKEMERGRNKCVPYMPDLNSTKEGKVCVNI EETHAGDYLR 388

hShp2.pro ELKLSKVGQGNTERTVWQYHFRTPDHGVPSDPGGVLDLEEVHKKOESI MDAGPVVHCSAGI GRTGTFI VI DII DI I REKGVDCDI DVPKTI QMVRS 499  
zshp2a.pro ELKLSKVGQGNTERTVWQYHFRAMPDHGVPSDPGGVLDLEEVKLKQEGITGAGPI VVHCSAGI GRTGTFI VI DII DI I REKGVDCDI DVPKTI QMVRS 500  
zshp2b.pro ELVTRLDREPPRCI WYQYLSMPDHGVPSDPGGVLSFLEQNRTOGSAPESSGPI VVHCSAGI GRTGT VI DII DI I NRQGLDCDI DVPKTI QVRQ 498

hShp2.pro QRSMMVQTEAQYRFIYMAVQHYIETLORRI EEEQSKKRGHEYTNIKYSLADQTSQDQSPLPCTPTPPCAEMREDSARVYENVGLMQQKSHR 594  
zshp2a.pro QRSMMVQTEAQYRFIYMAVQHYIETLORRI EEEQSKKRGREYTNIKYSLSDLQSDQSPLPCTPTPTCADMRDSSRVYENVGLMQQKSHR 594  
zshp2b.pro QRSMMVQTEAQYRFIYMAVQYI DITAKRL EEEQRNKKEREYSNIIKY PQMSN-AR--AKPNMSSSRSSSVWDDSSVYENLNIKNPKGSSNTRR 592
